# Supplementary material
Source: PubMed Central journal article supplement (PMC6061939)
Supplement: NIHMS981503-supplement-1.pdf [file NIHMS981503-supplement-1.pdf]

## Appendix A. Supplementary data

**Table S1. Diffraction data collection and structure refinement statistics**

| Protein                           | Sce-Mdm12<br>PDB ID 5VKZ   | Mdm12/ Mmm1Δ               |
|-----------------------------------|----------------------------|----------------------------|
| <b>Data set</b>                   | <b>APS 042311 24-ID-C</b>  | <b>ALS 101716 831</b>      |
| <b>Data collection statistics</b> |                            |                            |
| Wavelength                        | 0.97918 Å                  | 0.97918 Å                  |
| Resolution (last shell)           | 85.3-4.1 Å (4.21-4.10 Å)   | 20.13-4.50 Å (4.62-4.50 Å) |
| Unique reflections                | 10,272 (744)               | 7,867 (564)                |
| Completeness                      | 99.5 % (99.7 %)            | 98.3 % (99.8 %)            |
| $I/\sigma(I)$                     | 9.4 (2.0)                  | 16.6 (1.6)                 |
| redundancy                        | 7.4 (7.5)                  | 3.9 (3.8)                  |
| $R_{sym}$                         | 10.6 % (98.1 %)            | 3.1 % (93.5 %)             |
| $R_{meas}^a$                      | 11.5 % (105.4 %)           | 3.6 % (108.9 %)            |
| CC(1/2) <sup>b</sup>              | 99.8 % (95.8 %)            | 100.0 % (65.5 %)           |
| Space group                       | P3 <sub>2</sub> 21         | 4/mmm (Laue class)         |
| Unit cell dimensions              | a=b=116.0 Å and c=161.7 Å  | a=b=167.0 Å c=89.2 Å       |
| AU content                        | 2 molecules (pseudo-dimer) | 1 complex                  |
| Solvent content                   | 78 %                       | 54 %                       |
| <b>Refinement statistics</b>      |                            |                            |
| Resolution                        | 85.3-4.1 Å (4.58-4.10 Å)   | -                          |
| Reflections                       | 10,248                     | -                          |
| work set / test set               | 9,229 / 1,019              | -                          |
| $R_{free} / R_{cryst}$            | 26.3 % / 24.8 %            | -                          |
| Map correlation $F_o-F_c$ (free)  | 82.8 % (88.0 %)            | -                          |
| ESD Luzzati plot                  | 1.383 Å                    | -                          |
| $B_{wilson}$                      | 143 Å <sup>2</sup>         | -                          |
| $B_{average}$                     | 162 Å <sup>2</sup>         | -                          |
| rmsd bonds                        | 0.01 Å                     | -                          |
| rmsd angles                       | 1.32 °                     | -                          |
| <b>Ramachandran analysis</b>      |                            |                            |
| allowed regions                   | 88.9%                      | -                          |
| generously allowed                | 9.2%                       | -                          |
| outliers                          | 1.4%                       | -                          |

r.m.s.d. is the root-mean square deviation from ideal geometry.

$R_{sym} = \frac{\sum_{hkl} \sum_i |I_{hkl,i} - \langle I_{hkl,i} \rangle|}{\sum_{hkl} \sum_i I_{hkl,i}}$  where  $\langle I_{hkl,i} \rangle$  is the average intensity of the multiple hkl, i observations for symmetry-related reflections.

$R_{meas}$  is the redundancy independent R-factor [1].

CC(1/2) percentage of correlation between intensities from random half-datasets [2].

$R_{cryst} = \frac{\sum |F_{obs} - F_{calc}|}{\sum |F_{obs}|}$ .  $F_{obs}$  and  $F_{calc}$  are observed and calculated structure factors,  $R_{free}$  is calculated from a set of randomly chosen reflections (10%), and  $R_{cryst}$  is calculated over the remaining reflections.

Structure quality was assessed in *MolProbity* [3] and *Polygon* [4].

**Table S2. Small angle X-ray scattering analysis of the Mdm12/Mmm1 $\Delta$  complex**

| protein        | oligomeric state       | calculated values from structures <sup>a</sup> |                  | experimental values determined by SAXS <sup>b</sup> |                  |
|----------------|------------------------|------------------------------------------------|------------------|-----------------------------------------------------|------------------|
|                |                        | $R_G$                                          | $D_{max}$        | <i>Fourier analysis</i><br>$R_G$                    | $D_{max}$        |
| <b>Mdm12</b>   | <b>monomer</b>         | <b>21.9 Å</b>                                  | <b>72 Å</b>      | -                                                   | -                |
|                | <b>dimer</b>           | <b>30.7 Å</b>                                  | <b>108 Å</b>     | -                                                   | -                |
| <b>complex</b> | <b>hetero-tetramer</b> | <b>55.3 Å</b>                                  | <b>195 ± 5 Å</b> | <b>46.7 ± 0.3 Å</b>                                 | <b>185 ± 5 Å</b> |

<sup>a</sup> the sets of theoretical  $R_G$  and  $D_{max}$  values correspond to the monomeric X-ray structure described in this study (PDB 5VKZ), the previously published Mdm12 dimeric structures (PDBs 5GYD and 5GYK) [5] and our pseudo-atomic model based on our NS-EM data of the Mdm12/Mmm1 $\Delta$  complex [6], as shown in Figures 4A and 4B.

<sup>b</sup> experimental values of  $R_G$  and  $D_{max}$  were determined for the Mdm12/Mmm1 $\Delta$  complex purified and crystallized as described in this work. Concentration of sample analyzed by SAXS ranged from 0.75 to 3 mg/ml and 4.8 to 14 mg/ml for the Guinier (low  $q$  range) and  $P(r)$  (high  $q$  range) analyses, respectively.

pRSF His-MBP-Sce Mmm1Δ 31,219 Da  
MGHHHHHHHHKIEEGKLVIIWINGDKGYNGLAEVGKKFEKDTGIKVTVEHPDKLEEKFPQVAATGDGPDIFWAHDRFGGYAQSGLL  
AEITPDKAFQDKLYPFTWDAVRYNGKLIAYPIAVEALSLIYNKDLLPNPPKTWEEIPALDKELKAKGKSALMFNLQEPYFTWPLIA  
ADGGYAFKYENGGYDIKDVGVNDAGAKAGLTFVLVLIKNKHMNADTDYSIAEAAFNKGETAMTINGPWAWSNIDTSKVNYGVTVLP  
TFKGQPSKPFVGVLSAGINAASPNKELAKEFLENYLLTDEGLEAVNKDKPLGAVALKSYYEELAKDPRIAATMENAQKEIMPNI  
QMSAFWYAVRTAVINAASGRQTVDEALKDAQTNSSSSPGLVPRGSGKQHYELNEEAENEHLQELALILEKTYYNVDVHPAESLDWFN  
VLVAQIIQQFRSEAWHRDNLHSLNDFIGRKSPDLPEYLDTIKITELDTGDDFFIFSNCRIOYSPNSGNKKLEAKIDIDLNDHLLT  
GVETKLLNYPKPGIAALPINLVSVIRFQAQCLTVSLTNAEEFASTSNSSSENGMEGNSGYFLMFSFSPEYRMEFEIKSLIGRS  
KLENIPKIGSVIEYQIKKWFVERCQVPRFQFVRLPSMWPRSKNTREEKPTLGLVPRGSHHHHHHHHHH\*

pCDF Sce Mdm12-His (C92S point mutation) 31,178 Da  
MSFDINWSTLESNDRLNDLIRKHLNSYLQNTQLPSYVSNLRVLDLFDLGVGPAITLKEITDPLDEFYDSIREEADQETEENNDNKE  
DSEHISPDRTIANHEGPKDDFEAPVMPSPNDIQFLEVEYKGDLLVITIGADLVNYPVEKFMTPVVKLSISDIGLHSLCIVACLK  
KQLFLSFLCDVSDPALDDNQTVDLDPKGPILAATKPLERISIVRSMKIETEIGEYQOGQSVLRSVGELEQFLFTIFKDFLRKELAW  
PSWINLDFNDGDELVPRGSHHHHHH\*

pCDF His-MBP-Scas Mdm12 27,709 Da  
MGHHHHHHHHKIEEGKLVIIWINGDKGYNGLAEVGKKFEKDTGIKVTVEHPDKLEEKFPQVAATGDGPDIFWAHDRFGGYAQSGLL  
AEITPDKAFQDKLYPFTWDAVRYNGKLIAYPIAVEALSLIYNKDLLPNPPKTWEEIPALDKELKAKGKSALMFNLQEPYFTWPLIA  
ADGGYAFKYENGGYDIKDVGVNDAGAKAGLTFVLVLIKNKHMNADTDYSIAEAAFNKGETAMTINGPWAWSNIDTSKVNYGVTVLP  
TFKGQPSKPFVGVLSAGINAASPNKELAKEFLENYLLTDEGLEAVNKDKPLGAVALKSYYEELAKDPRIAATMENAQKEIMPNI  
QMSAFWYAVRTAVINAASGRQTVDEALKDAQTNSSSSPGLVPRGSFNINWSEIGSDASISEAVKDHLSYSLQNVSLPSFVNNLKITD  
FSFGAIAPTIILKEITDPLPDFYESVNEGLVEGDEGWTIPSPSDTQFLIEVEYKGDLFVTMSGELVLNYPVPSQEFIKLPKLAVTNI  
GFHSLCLVAYLAKQIFVSIKCDVSDPILDEQNSEPLDNGTIFMAPKPPFERISIRSMNIDTEIGQQYQEGSTLKNVKGLEQFL  
LEKFKDLLRKEIAWPSWINLDSLGDNNELVPRGSHHHHHH\*

pCDF His-MBP-Ddis Mdm12 23,171 Da  
MGHHHHHHHHKIEEGKLVIIWINGDKGYNGLAEVGKKFEKDTGIKVTVEHPDKLEEKFPQVAATGDGPDIFWAHDRFGGYAQSGLL  
AEITPDKAFQDKLYPFTWDAVRYNGKLIAYPIAVEALSLIYNKDLLPNPPKTWEEIPALDKELKAKGKSALMFNLQEPYFTWPLIA  
ADGGYAFKYENGGYDIKDVGVNDAGAKAGLTFVLVLIKNKHMNADTDYSIAEAAFNKGETAMTINGPWAWSNIDTSKVNYGVTVLP  
TFKGQPSKPFVGVLSAGINAASPNKELAKEFLENYLLTDEGLEAVNKDKPLGAVALKSYYEELAKDPRIAATMENAQKEIMPNI  
QMSAFWYAVRTAVINAASGRQTVDEALKDAQTNSSSSPGLVPRGSLKIYWDVTEKHSIKLMNYLNERISGLTETYDMVGEMKITNL  
SLGSKPPKFEIIQISDPDALILGNKSPNGIELRAKIGYDGDAYIGIQAEFKVNLPTPNFISFPVNVKVSNIIFSGIATVIYDSDKV  
SFSFLPENGSDPDDFTPLKDVKFETQLGDSAQQVLVDLQKQNFIVDLIKTYLKKYLVFPNKMTIPLSEFNNLVPRGSHHHHHH\*

pJexp Sce Mdm12T4L-His 46,878 Da  
MSFDINWSTLESNDRLNDLIRKHLNSYLQNTQLPSYVSNLRVLDLFDLGVGPAITLKEITDPLDEFYDSIREEADQETEENNDNKE  
DSGSSGNIFEMRLRIDEGLRLKIYKDTTEGYTTIGIGHLLTKSPSLNAAKSELDKAIGRNTNGVITKDEAEKLFNQDVDAAVRGILRN  
AKLKPVYDSLDAVRAALINMVFQMGETGVAGFTNSLRMLQOKRWDEAAVNLAKSRYNQTPNRAKRVITTFRTGTWDAYAAGSPN  
DIQFLEVEYKGDLLVITIGADLVNYPVEKFMTPVVKLSISDIGLHSLCIVACLKQLFLSFLCDVSDPALDDNQTVDLDPKGPILA  
ATKPLERISIVRSMKIETEIGEYQOGQSVLRSVGELEQFLFTIFKDFLRKELAWPSWINLDFNDGDELVPRGSHHHHHHHHHH\*

Histidine tag

Maltose Binding Protein

Proteolytic cleavage site for thrombin.

Mdm12 or Mmm1 protein. Underlined residues were replaced with the T4L protein insertion in the internal Sce-Mdm12T4L chimeric construct.

T4 Lysozyme

**Fig. S1. Protein constructs used for the reconstitution of the different Mdm12 and Mdm12/ Mmm1Δ complexes.** The molecular weight of each ERMES protein obtained after proteolytic treatment with thrombin (no histidine tag and/or MBP left) is indicated.

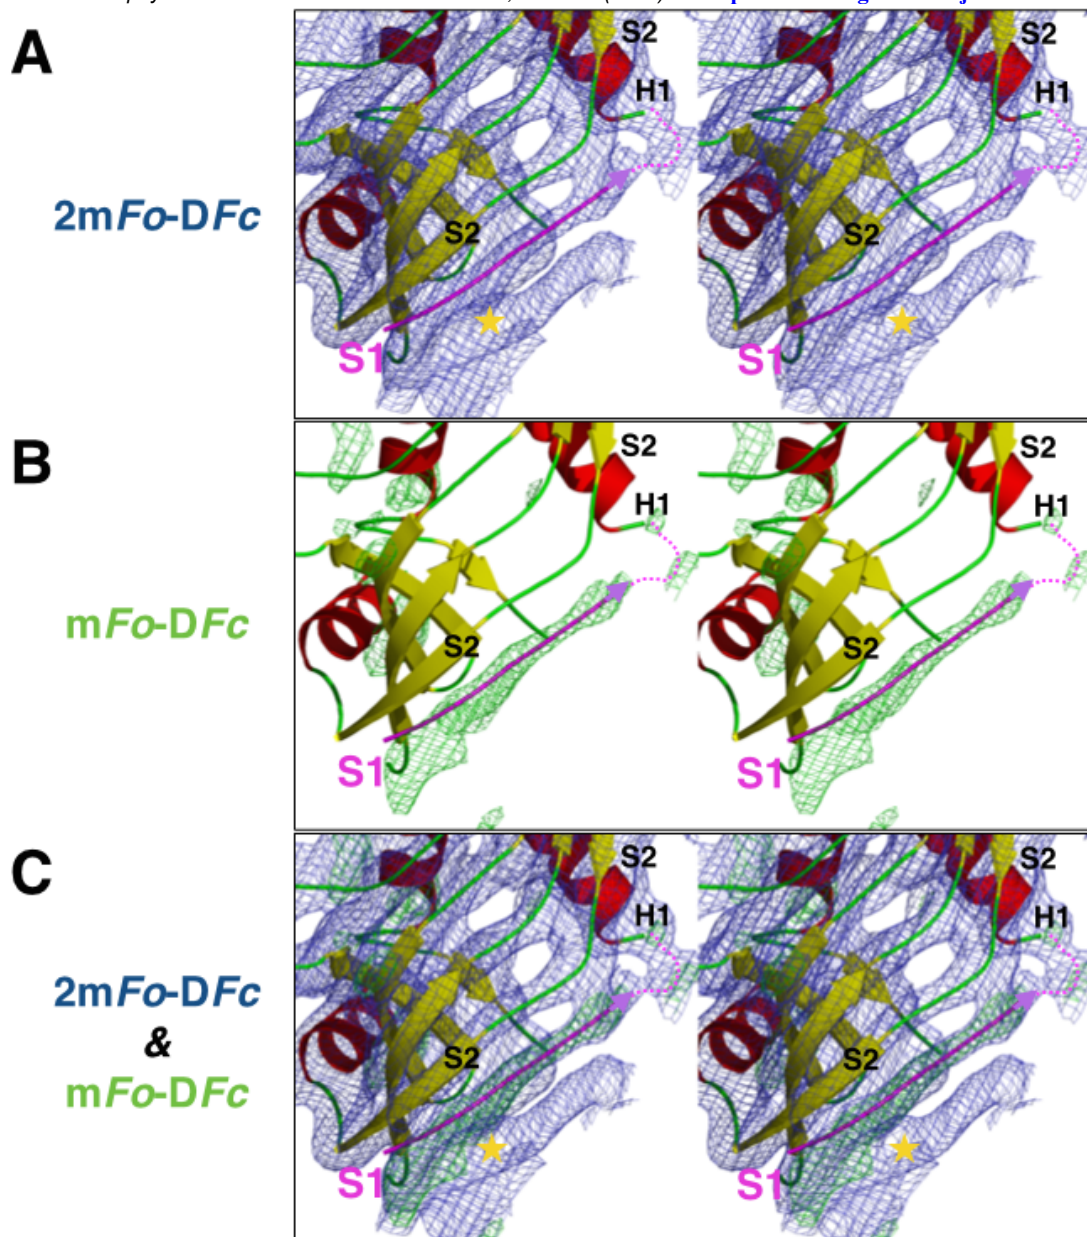

**Fig. S2. Unsharpened maximum likelihood weighted difference maps showing the non-swapped conformation of the N-terminal  $\beta$ -strand.** Stereo view of the initial *2mFo-DFc* (A) and *mFo-DFc* (B) Fourier difference maps contoured at 1.1  $\sigma$  and 3.0  $\sigma$ , respectively, following molecular replacement in *Phaser* [7] and a single cycle of refinement in *Phenix* [8]. Molecular replacement was performed using the monomer of *Sce-Mdm12* (PDB 5GYD) [5] as model where the 14 first N-terminal residues corresponding to the swapped  $\beta$ -strand S1 and the loop connecting with helix H1 were omitted. The backbone of Mdm12 is colored in red (helices), yellow (strands), and green (loops). The  $\beta$ -strand S1 drawn in magenta corresponds to the N-terminal  $\beta$ -strand S1 adopting a *non-swapped* conformation in our structure; it was *not* included in the initial model used for molecular replacement and the first cycle of refinement and is just shown to mark its true final position. (C) Same stereo view as in (A) and (B) but the two difference maps are shown superposed. These maps are *not* sharpened. The yellow star indicates a neighboring molecule (not displayed for clarity) related by crystallographic symmetry.

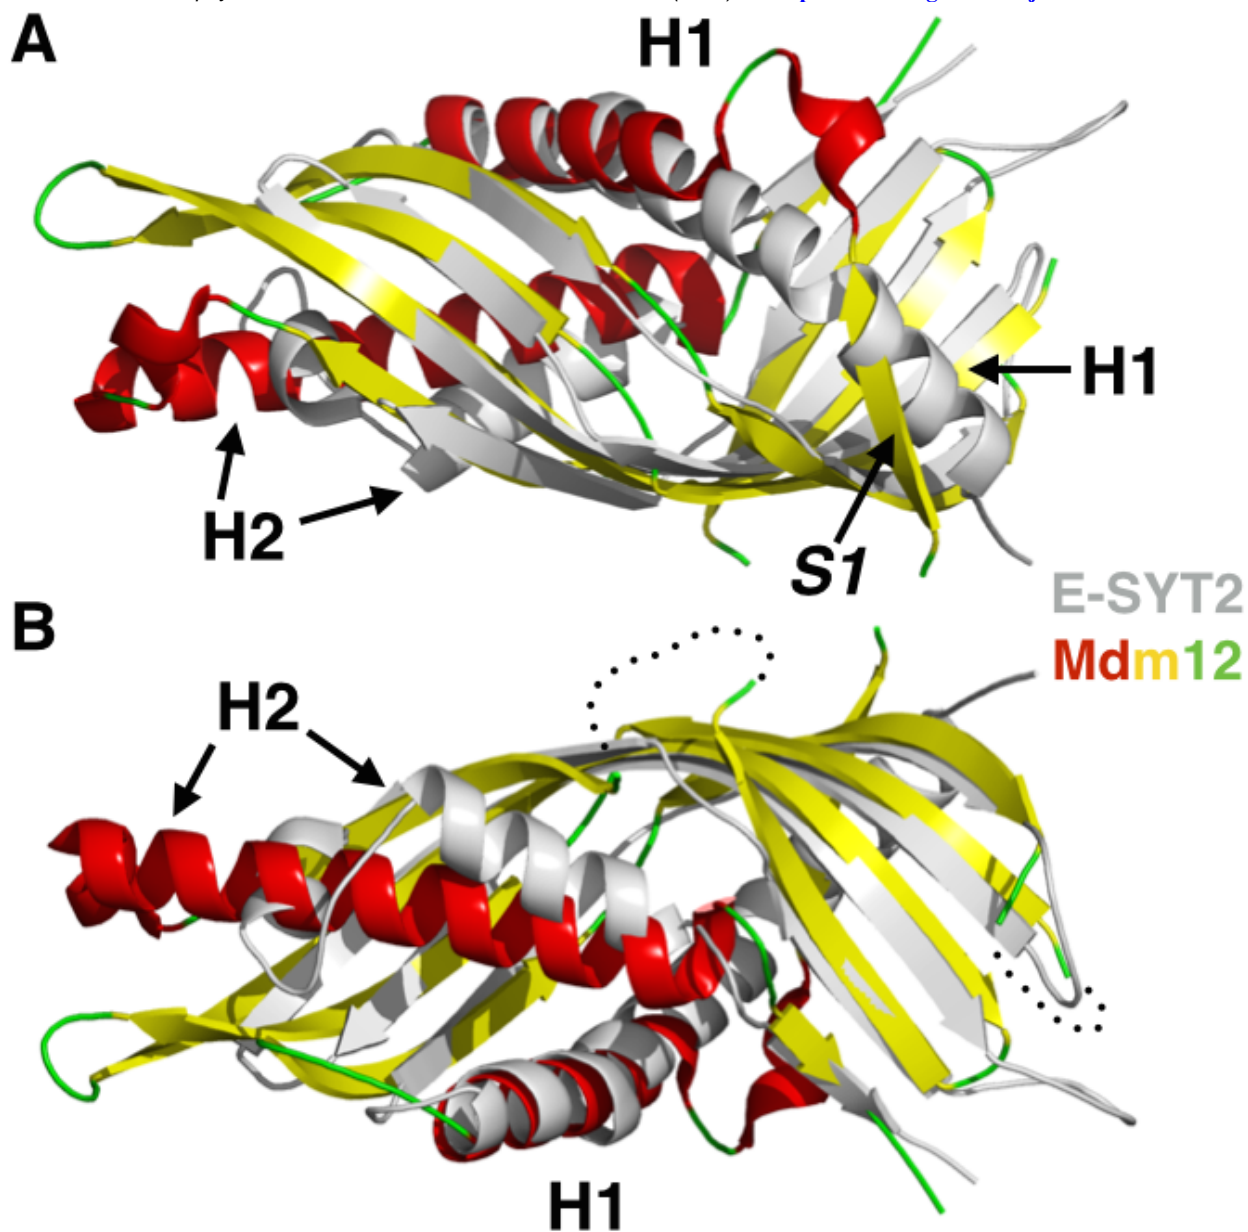

**Fig. S3. Superposition of the crystal structures of the SMP domains of Mdm12 and E-SYT2.** The superposed SMP folds observed in Mdm12 (yellow, green and red) and E-SYT2 (white) are shown in two different orientations (**A** and **B**) to highlight the most salient differences. For the sake of clarity, the two non-conserved insertions present in Mdm12 have been omitted and are shown as dotted lines. The two SMPs differ at their N-terminus with the presence of a N-terminal strand (S1) in Mdm12 replacing the bent N-terminus of the long  $\alpha$ -helix H1 of E-SYT2. The other major difference is observed at the N-terminus of the  $\alpha$ -helix H2; it is much shorter in the case of E-SYT2 [9]. The N-terminus of  $\alpha$ -helix H1 of E-SYT2 is involved in its homo-dimerization, while the N-terminal  $\beta$ -strand S1 of Mdm12 that replaces it might play a similar role. In each SMP domain, the backbones of the antiparallel  $\beta$ -barrel formed by the 6  $\beta$ -strands align remarkably well.



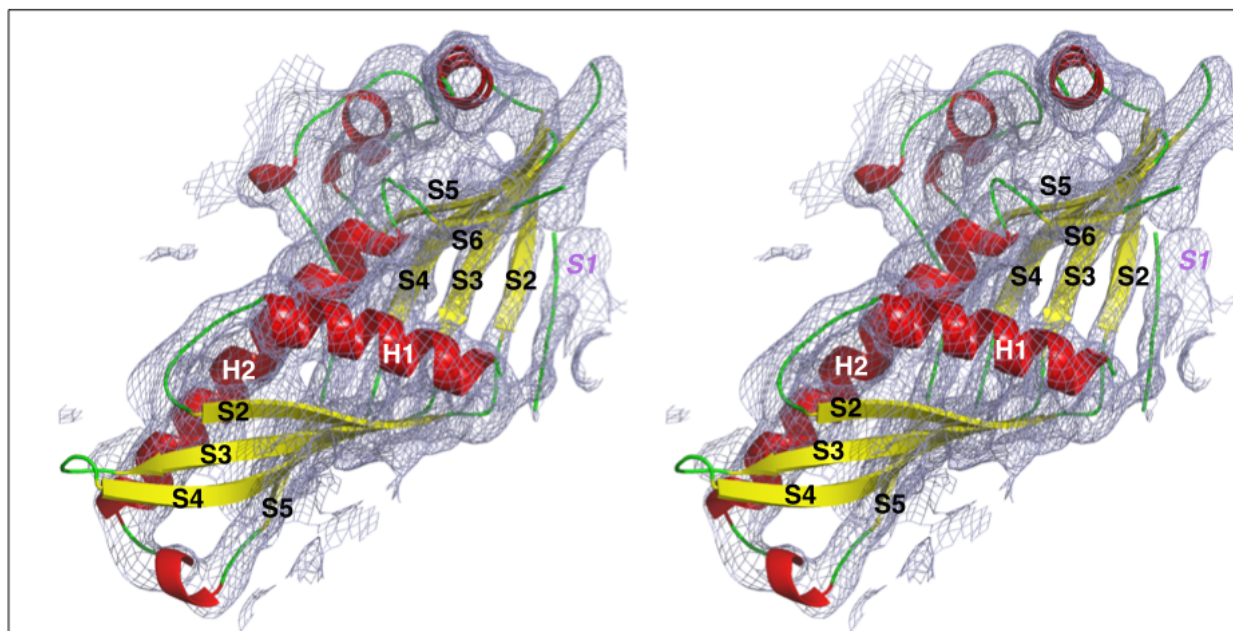

**Fig. S4. Overall quality of the final maximum likelihood weighted  $2mFo-DFc$  electron density for monomer A.** Stereo-view of the unsharpened electron density map contoured at  $1.3\sigma$  for the final refined structure shown in two different orientations. The non-swapped N-terminal  $\beta$ -strand S1 is highlighted in magenta. Secondary structure elements are labeled.

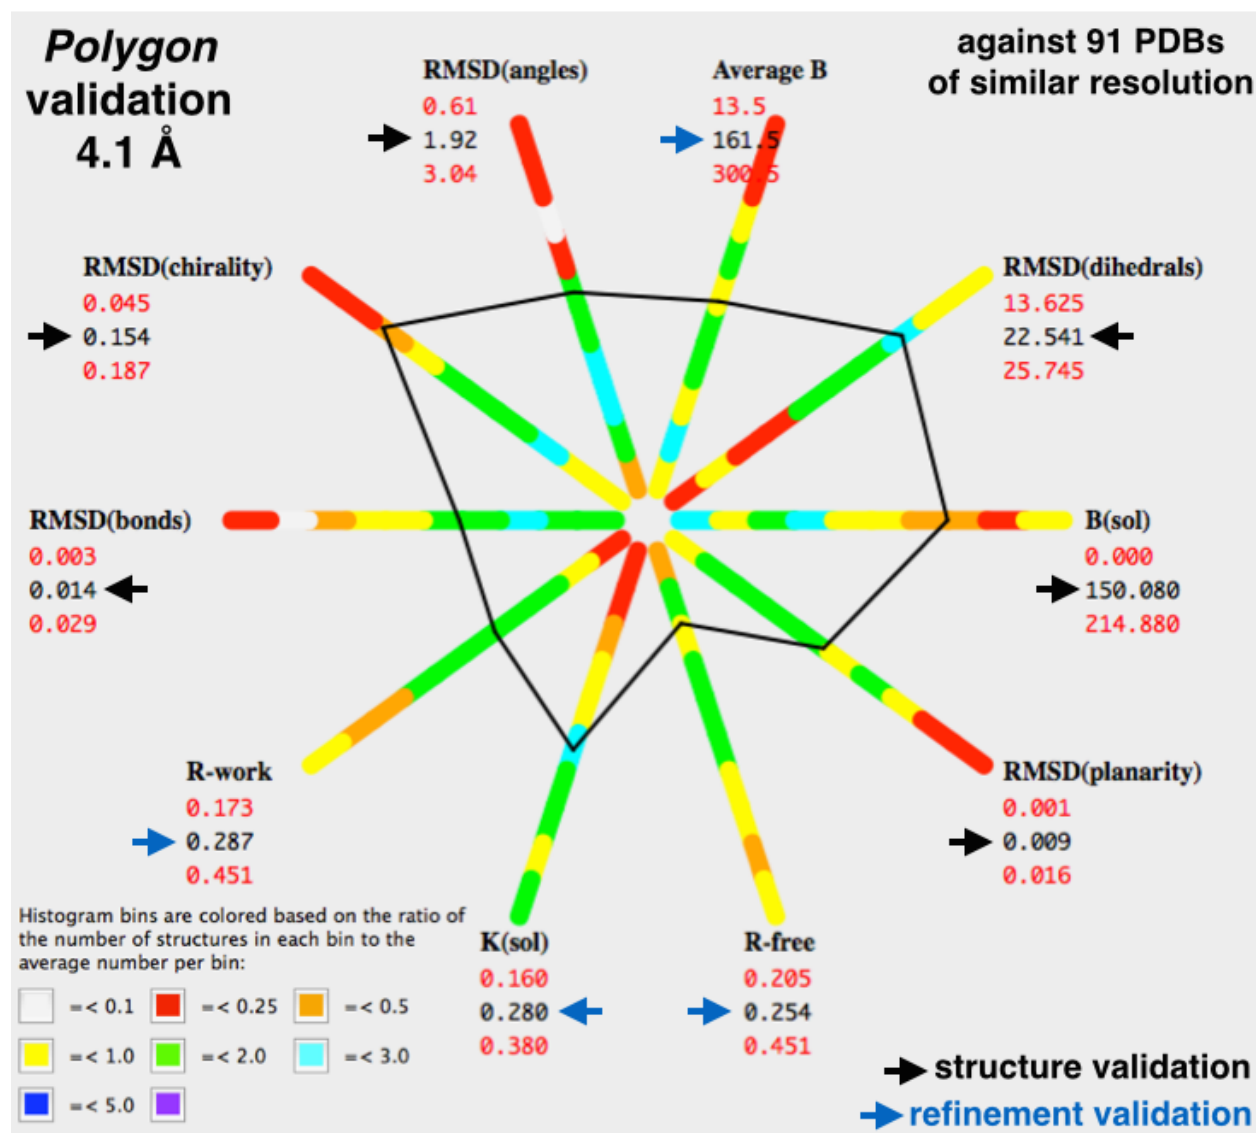

**Fig. S5. Structure and refinement quality assessment for the final model of Sce-Mdm12 refined at 4.1 Å resolution using Polygon analysis [4].** The graph shows the histograms of the distribution across 91 PDB entries of similar resolution, with the range specified by numbers printed in red. Statistics for the current structure are printed in black (pointed by arrows); the connecting polygon (in black) shows where these values fall in the distribution.

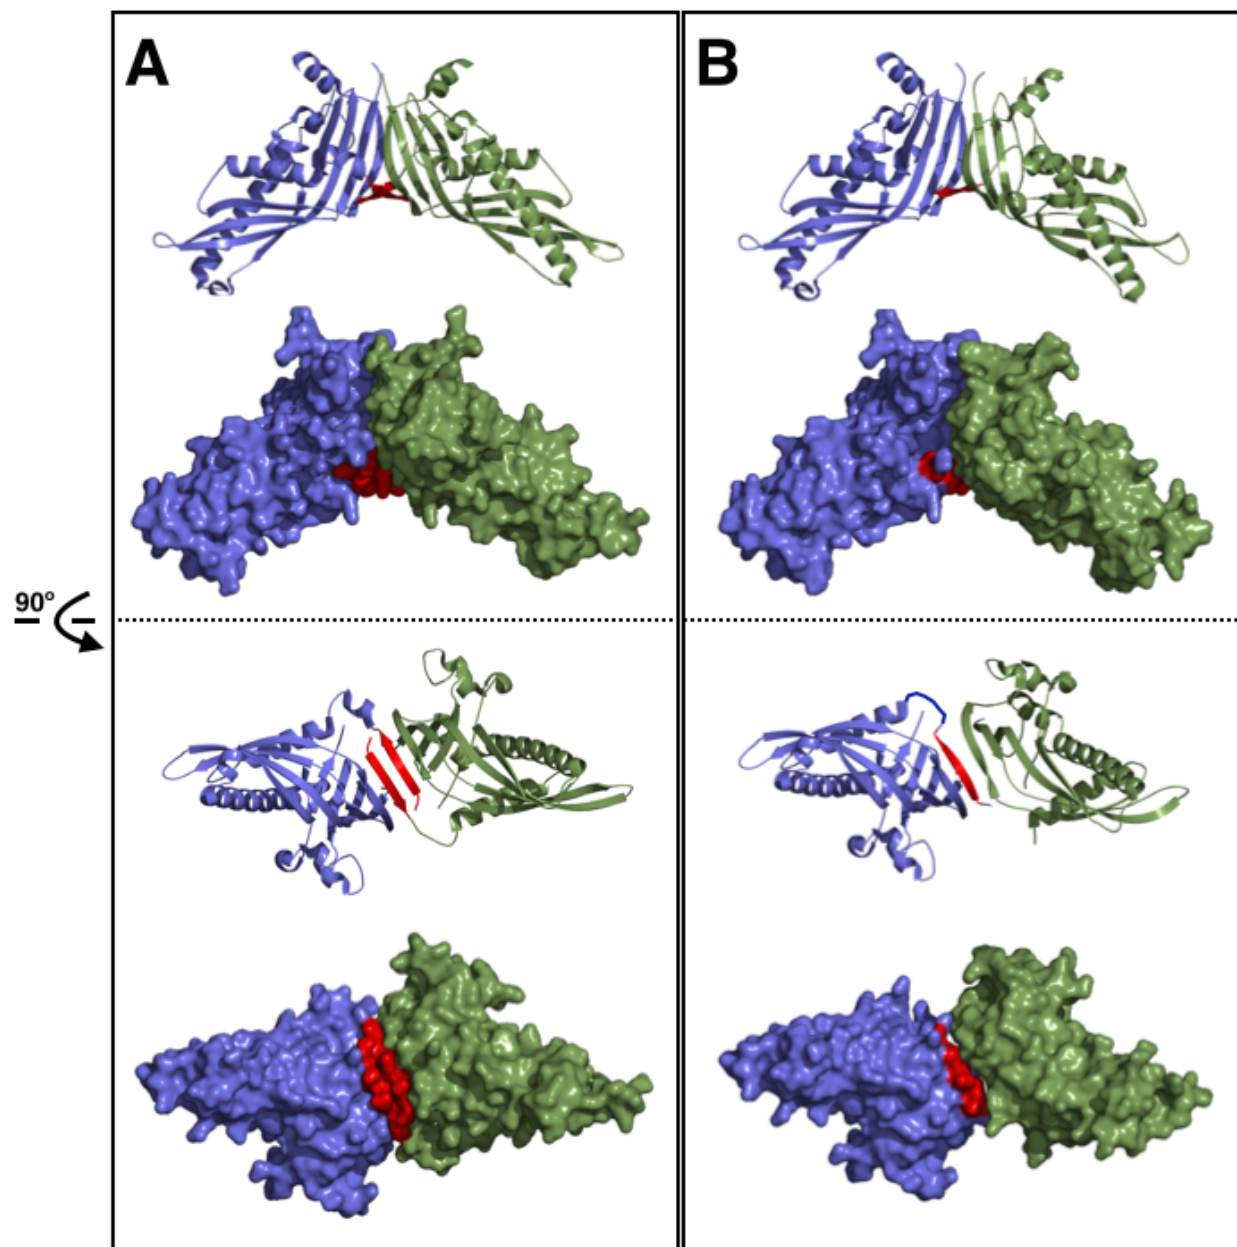

**Fig. S6.** The 'head-to-head' dimerization of the Mdm12 SMP/TULIP domain. Comparison between (A) the swapped 'head-to-head' dimer observed *in the asymmetric units* of structures 5GYD and 5GYK [5] and (B) our non-swapped 'head-to-head' pseudo-dimer observed *in the unit cell*. The N-terminal  $\beta$ -strand S1 is colored in red. Cartoon and surface representations are shown for two views (down the two-fold axis and perpendicular to the two-fold axis). Arrangement in (A) is the result of non-crystallographic symmetry while arrangement in (B) is a result of crystallographic symmetry.



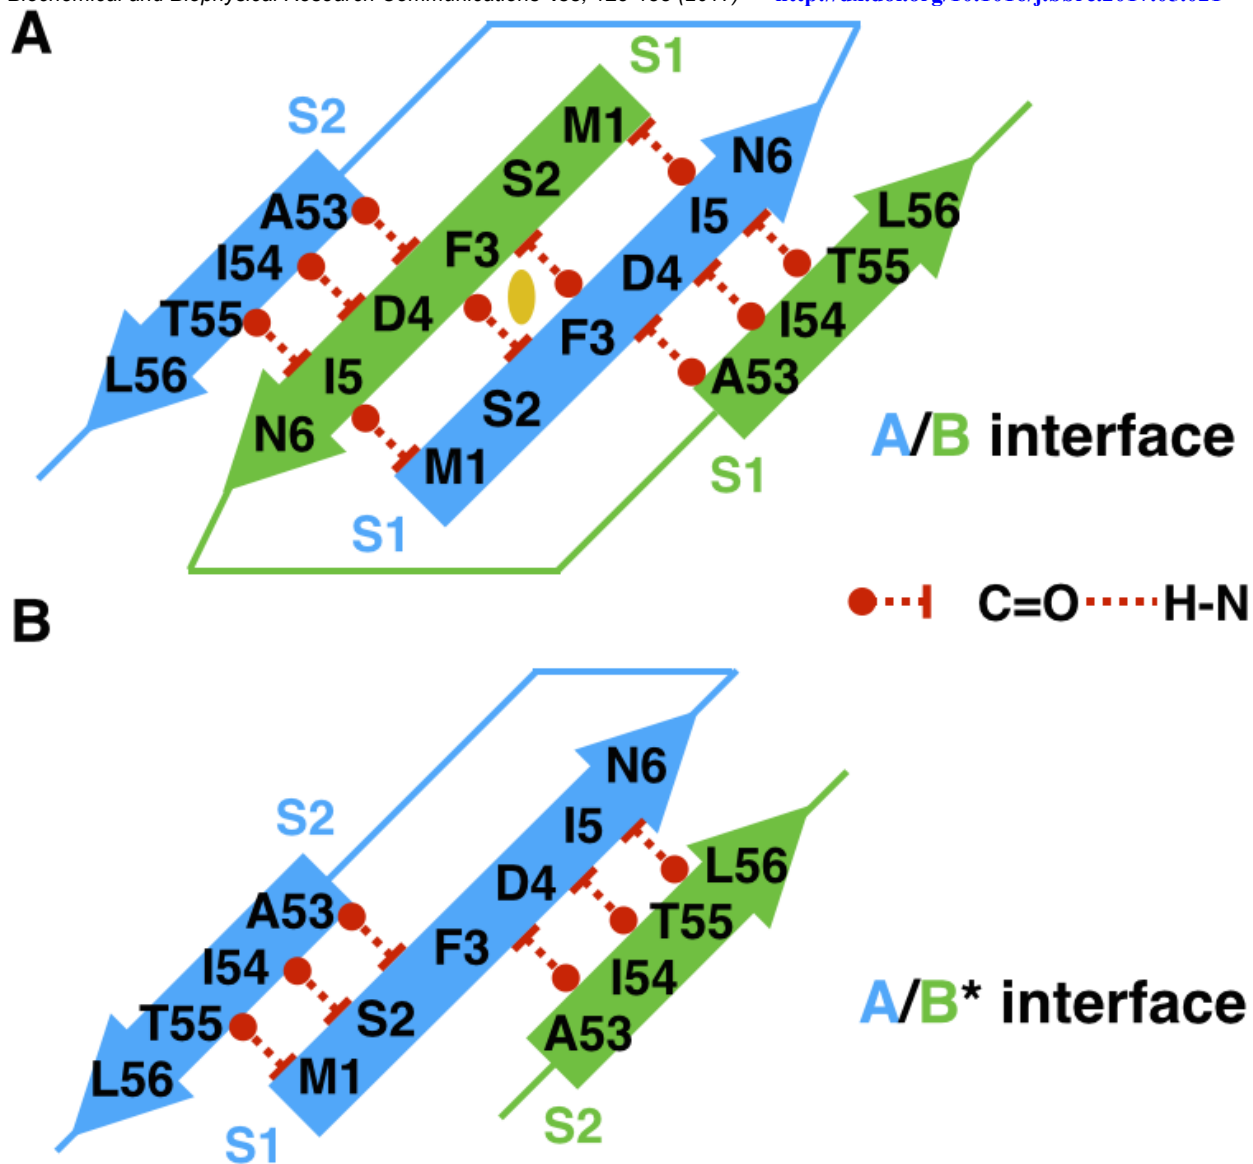

**Fig. S7. Schematic of the interactions between the N-terminal  $\beta$ -strand S1 and the SMP/TULIP fold in Mdm12 ( $\beta$ -strand S2). (A) Swapping of N-terminal  $\beta$ -strands S1 at the two-fold symmetric 'head-to-head' dimerization interface described by Jeong *et al.* (PDBs 5GYD and 5GYK) [5]. (B) Asymmetric interface in the crystallographic 'head-to-head' pseudo-dimer interface observed in our structure.**

## References to Supplementary Data

- [1] K. Diederichs, P.A. Karplus, Improved R-factors for diffraction data analysis in macromolecular crystallography, *Nat Struct Biol* **4** (1997) 269-275.
- [2] P.A. Karplus, K. Diederichs, Linking crystallographic model and data quality, *Science* **336** (2012) 1030-1033.
- [3] V.B. Chen, W.B. Arendall, 3rd, J.J. Headd, D.A. Keedy, R.M. Immormino, G.J. Kapral, L.W. Murray, J.S. Richardson, D.C. Richardson, MolProbity: all-atom structure validation for macromolecular crystallography, *Acta Crystallogr D Biol Crystallogr* **66** (2010) 12-21.
- [4] L. Urzhumtseva, P.V. Afonine, P.D. Adams, A. Urzhumtsev, Crystallographic model quality at a glance, *Acta Crystallographica Section D-Biological Crystallography* **65** (2009) 297-300.
- [5] H. Jeong, J. Park, C. Lee, Crystal structure of Mdm12 reveals the architecture and dynamic organization of the ERMES complex, *EMBO Rep* (2016).
- [6] A.P. AhYoung, J. Jiang, J. Zhang, X. Khoi Dang, J.A. Loo, Z.H. Zhou, P.F. Egea, Conserved SMP domains of the ERMES complex bind phospholipids and mediate tether assembly, *Proc Natl Acad Sci U S A* **112** (2015) E3179-3188.
- [7] A.J. McCoy, R.W. Grosse-Kunstleve, P.D. Adams, M.D. Winn, L.C. Storoni, R.J. Read, Phaser crystallographic software, *J Appl Crystallogr* **40** (2007) 658-674.
- [8] P.D. Adams, P.V. Afonine, G. Bunkoczi, V.B. Chen, N. Echols, J.J. Headd, L.W. Hung, S. Jain, G.J. Kapral, R.W. Grosse Kunstleve, A.J. McCoy, N.W. Moriarty, R.D. Oeffner, R.J. Read, D.C. Richardson, J.S. Richardson, T.C. Terwilliger, P.H. Zwart, The Phenix software for automated determination of macromolecular structures, *Methods* **55** (2011) 94-106.
- [9] C.M. Schauder, X. Wu, Y. Saheki, P. Narayanaswamy, F. Torta, M.R. Wenk, P. De Camilli, K.M. Reinisch, Structure of a lipid-bound extended synaptotagmin indicates a role in lipid transfer, *Nature* (2014).
